# Supplementary material for: Mo-doped cobaltous sulfide nanosheet arrays as efficient catalysts for the sulfion oxidation reaction promoting hydrogen production with ultra-low electric energy consumption
Source: Royal Society of Chemistry journal article supplement (doi:10.1039/d3qi01582c), 2023-01-01
Supplement: d3qi01582c1.pdf [file d3qi01582c1.pdf]

## Supporting Information

### **Mo-doped cobaltous sulfide nanosheet arrays as efficient catalysts for sulfion oxidation reaction promoting hydrogen production with ultra-low electric energy consumption**

Xiangmin Tang,<sup>a,b</sup> Yang Zhang,<sup>a</sup> Fangfang Wu,<sup>c</sup> Bing Li,<sup>d</sup> Jiexue Wang,<sup>b</sup> Xiaoqin Li,<sup>d</sup>

Ruihua Rao,<sup>c</sup> Jiapeng Hu,<sup>c\*</sup> Dan Xiao<sup>a,c\*</sup> and Taotao Gao<sup>a\*</sup>

a School of Mechanical Engineering, Institute for Advanced Study, Chengdu University, Chengdu, 610106, P. R. China.

E-mail: [xiaodan@scu.edu.cn](mailto:xiaodan@scu.edu.cn) and [gaotaotao@cdu.edu.cn](mailto:gaotaotao@cdu.edu.cn)

b Sichuan Provincial Key Laboratory for Structural Optimization and Application of Functional Molecules, College of Chemistry and Life Science, Chengdu Normal University, Chengdu, 611130, P. R. China

c Fujian Provincial Key Laboratory of Eco-Industrial Green Technology, College of Ecology and Resources Engineering, Wuyi University, Wuyishan, 354300, P. R. China,

E-mail: [wuyuwqhjp@163.com](mailto:wuyuwqhjp@163.com)

d Hubei Key Laboratory of Wudang Local Chinese Medicine Research, Hubei University of Medicine, Shiyan, 442000, P. R. China.

e College of Chemical Engineering, Sichuan University, Chengdu, 610065, P. R. China

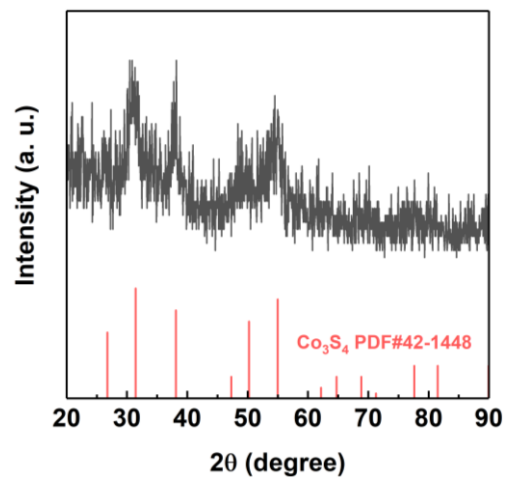

**Fig. S1** XRD pattern of a scraped powder sample from Mo-Co-S/NF

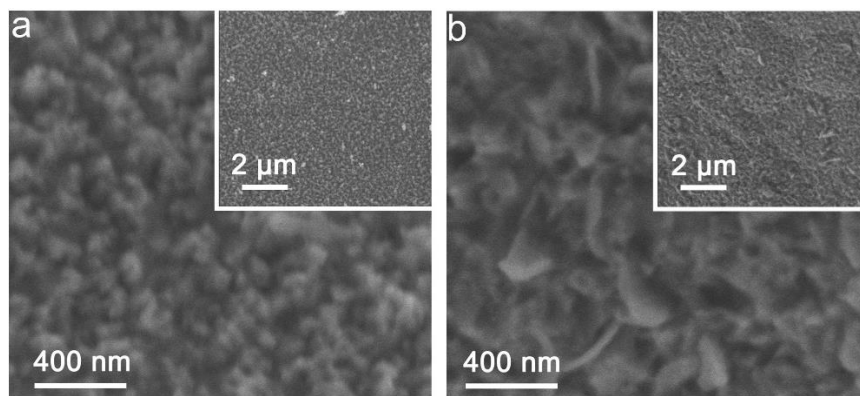

**Fig. S2** SEM images of (a) Co-S/NF and (b) Mo-S/NF.

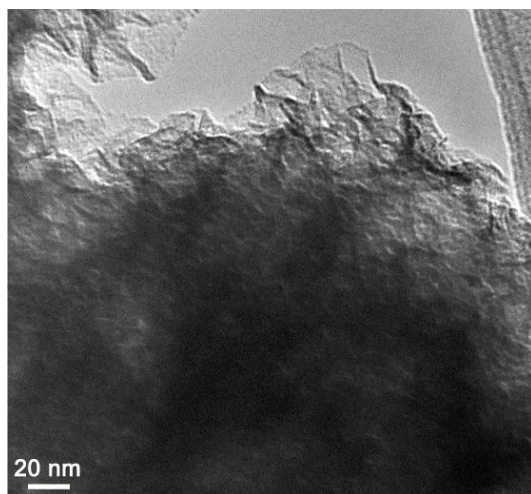

**Fig. S3** TEM image of Co-Mo-S/NF.

**Table. S1** The binding energy of Co 2p and Mo 3d XPS peaks.

|                                    | Mo-Co-S/NF | Co-S/NF | Mo-S/NF |
|------------------------------------|------------|---------|---------|
| Co <sup>2+</sup> 2p <sub>3/2</sub> | 781.6      | 781.4   | /       |
| Co <sup>3+</sup> 2p <sub>3/2</sub> | 778.6      | 778.4   | /       |
| Co <sup>2+</sup> 2p <sub>1/2</sub> | 797.8      | 797.5   | /       |
| Co <sup>3+</sup> 2p <sub>1/2</sub> | 795.8      | 795.5   | /       |
| Mo <sup>4+</sup> 3d <sub>5/2</sub> | 227.9      | /       | 228.3   |
| Mo <sup>6+</sup> 3d <sub>5/2</sub> | 231.8      | /       | 232.2   |
| Mo <sup>4+</sup> 3d <sub>3/2</sub> | 233.0      | /       | 233.4   |
| Mo <sup>6+</sup> 3d <sub>3/2</sub> | 235.1      | /       | 235.4   |

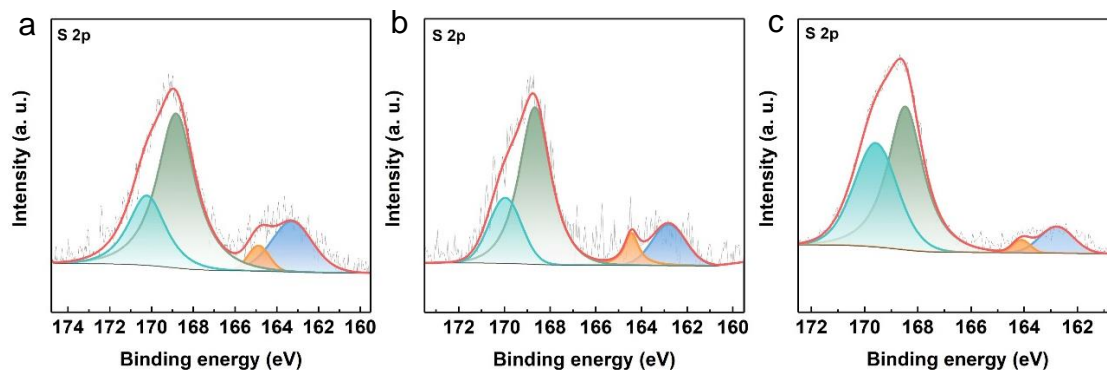

**Fig. S4.** The S 2p spectra of (a) Co-Mo-S/NF, (b) Co-S/NF and (c) Mo-S/NF.

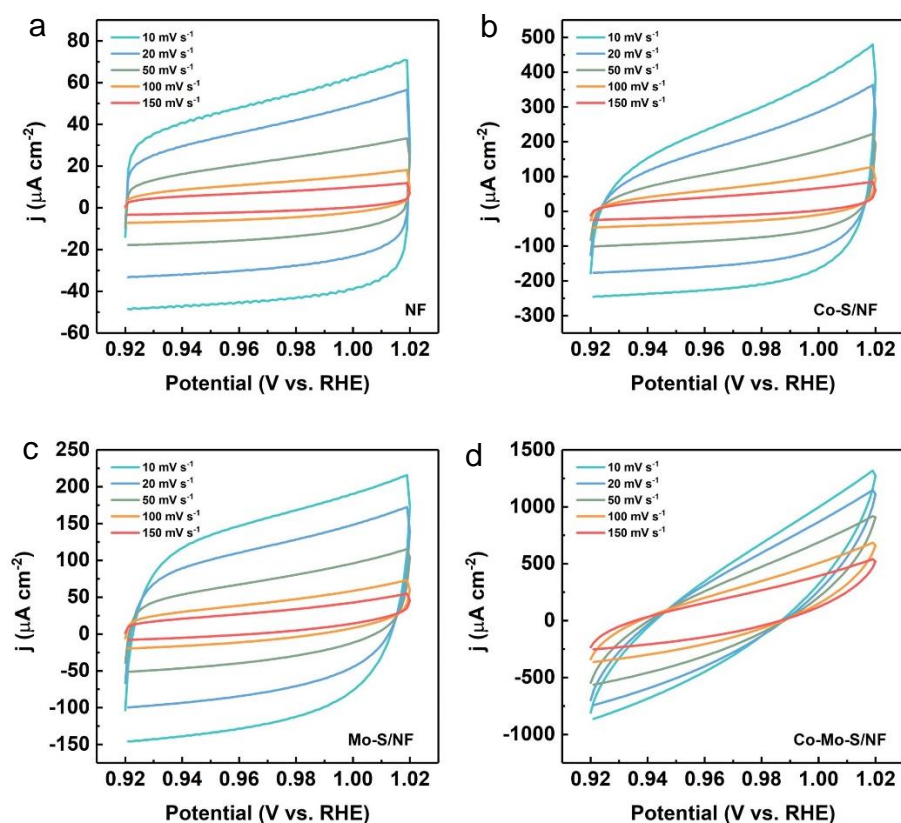

**Fig. S5** The double-layer capacitance measurements of the electrodes; (a-d) the cyclic voltammograms of the catalysts at a series of scan rates of 10, 20, 50, 100, and 150  $\text{mV s}^{-1}$  from 0.92 to 1.02 V vs. RHE in 1 M NaOH.

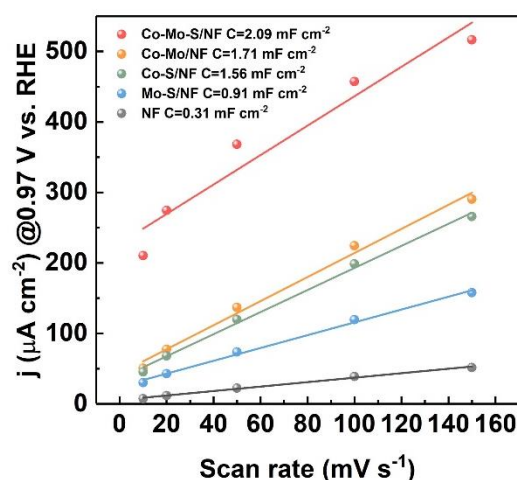

**Fig. S6** The linear fitting of the oxidation currents of the catalysts at 0.97 V vs. RHE versus scan rates.

Electrical double-layer capacitance measurements were used to determine the electrochemical active surface area (ECSA) of the catalysts. According to Fig. S5, the electrical double-layer capacitance could be obtained based on the specific capacitance value of a smooth standard with a real surface area of 1 cm<sup>2</sup>. 40 μF cm<sup>2</sup> is considered as the value of specific capacitance for a smooth standard with a real surface area of 1 cm<sup>2</sup> based on previous studies.

The electrochemical active surface area could be obtained via the following equation:

$$A_{\text{ECSA}} = \frac{\text{The electrical double-layer capacitor}}{40}$$

For example:

$$\text{Co-S/NF: } A_{\text{ECSA}} = \frac{2090}{40} = 52.25 \text{ cm}^2_{\text{ECSA}}$$

**Table S2** The calculated ECSA of the obtained electrodes

| Catalysts                               | Mo-Co-S/NF | Co-S/NF | Mo-S/NF | NF   |
|-----------------------------------------|------------|---------|---------|------|
| $C_{\text{dl}}$ (mF cm <sup>-2</sup> )  | 2.09       | 1.56    | 0.91    | 0.31 |
| ECSA (cm <sup>2</sup> <sub>ECSA</sub> ) | 52.25      | 39.00   | 22.75   | 7.75 |

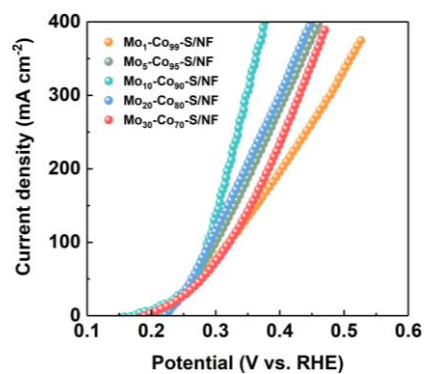

**Fig. S7** LSV curves of Mo-Co-S/NF with different atomic ratios between Co and Mo species.

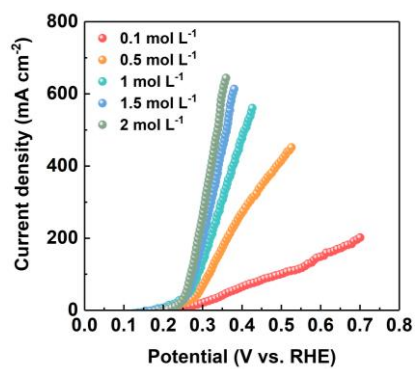

**Fig. S8** LSV curves of the Mo-Co-S/NF in the electrolytes with different concentrations of Na<sub>2</sub>S.

**Table S3.** Comparison of SOR catalytic activity.

| Catalysts                         | Electrolytes                      | Potential (V vs.<br>RHE)<br>@ 100 mA cm <sup>-2</sup> | References |
|-----------------------------------|-----------------------------------|-------------------------------------------------------|------------|
| Co-Ni <sub>3</sub> S <sub>2</sub> | 1 M NaOH+1M<br>Na <sub>2</sub> S  | 0.59                                                  | 1          |
| Cu <sub>2</sub> S/NF              | 1 M NaOH+1M<br>Na <sub>2</sub> S  | 0.44                                                  | 2          |
| WS <sub>2</sub> NSs               | 1 M NaOH+1M<br>Na <sub>2</sub> S  | ~0.75                                                 | 3          |
| CoS <sub>2</sub> @C/MXene/NF      | 1 M NaOH+1M<br>Na <sub>2</sub> S  | 0.389                                                 | 4          |
| VSe <sub>2</sub>                  | 1 M NaOH+1M<br>Na <sub>2</sub> S  | 0.45                                                  | 5          |
| Graphite electrode                | 1 M NaOH+<br>1M NaHS+2 M<br>NaClb | 0.51                                                  | 6          |
| Pt disk                           | 1M Na <sub>2</sub> S              | 1.0 (vs. SCE)                                         | 7          |
| CoNi@NGs                          | 1 M NaOH+1M<br>Na <sub>2</sub> S  | 0.52                                                  | 8          |
| Mo-Co-S/NF                        | 1 M NaOH+1M<br>Na <sub>2</sub> S  | 0.294                                                 | This work  |
| Co-S/NF                           | 1 M NaOH+1M<br>Na <sub>2</sub> S  | 0.467                                                 | This work  |
| Mo-S/NF                           | 1 M NaOH+1M<br>Na <sub>2</sub> S  | 0.582                                                 | This work  |

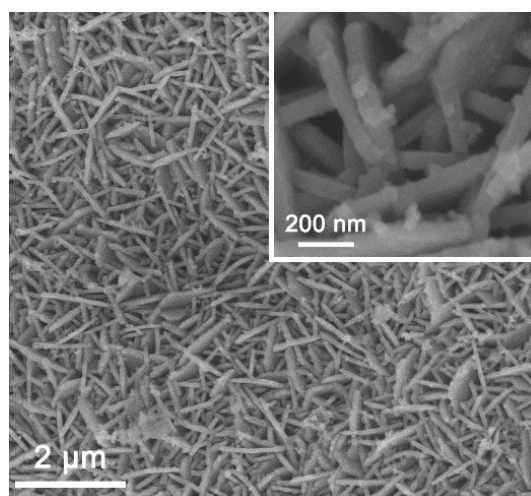

**Fig. S9.** The SEM images of Co-Mo-S/NF after electrocatalytic SOR for 40 hours.

**Table S4.** Comparison of the electrochemical hydrogen production performance of the two-electrode electrolytic system.

| Catalysts                         | Electrolyte                                                                                                                                                            | Potential (V)<br>@ 100 mA cm <sup>-2</sup> | References |
|-----------------------------------|------------------------------------------------------------------------------------------------------------------------------------------------------------------------|--------------------------------------------|------------|
| Co-Ni <sub>3</sub> S <sub>2</sub> | 1 M NaOH+1M Na <sub>2</sub> S   <br>1 M NaOH+1M Na <sub>2</sub> S                                                                                                      | 0.950                                      | 1          |
| Cu <sub>2</sub> S/NF              | 1 M NaOH+1M Na <sub>2</sub> S   <br>1 M NaOH                                                                                                                           | 0.640                                      | 2          |
| WS <sub>2</sub> NSs               | 1 M NaOH+2 M Na <sub>2</sub> S   <br>2.5 M H <sub>2</sub> SO <sub>4</sub>                                                                                              | ~1.24                                      | 3          |
| CoS <sub>2</sub> @C/MXene/NF      | 1 M NaOH+1M Na <sub>2</sub> S   <br>Sea water                                                                                                                          | ~0.61                                      | 4          |
| CoNiCuMnMo-NPs/CC                 | 0.1M KOH+0.1 M MGLY   <br>0.5 M H <sub>2</sub> SO <sub>4</sub>                                                                                                         | 0.550/-/-                                  | 9          |
| CC@N-CoP                          | 0.96 M FeSO <sub>4</sub> /0.74 M Fe <sub>3</sub> (SO <sub>4</sub> ) <sub>2</sub><br>in 0.5 M H <sub>2</sub> SO <sub>4</sub>   <br>0.5 M H <sub>2</sub> SO <sub>4</sub> | 1.18                                       | 10         |
| Mo-Co-S/NF    Pt-C/CP             | 1 M NaOH+1M Na <sub>2</sub> S   <br>0.5 M H <sub>2</sub> SO <sub>4</sub>                                                                                               | -0.257                                     | This work  |
| Mo-Co-S/NF    Pt-C/CP             | 1 M NaOH+1M Na <sub>2</sub> S   <br>1 M NaOH                                                                                                                           | 0.515                                      | This work  |
| Mo-Co-S/NF    Pt-C/CP             | 1 M NaOH    0.5 M H <sub>2</sub> SO <sub>4</sub>                                                                                                                       | 0.840                                      | This work  |
| Mo-Co-S/NF    Pt-C/CP             | 1 M NaOH    1 M NaOH                                                                                                                                                   | 1.653                                      | This work  |

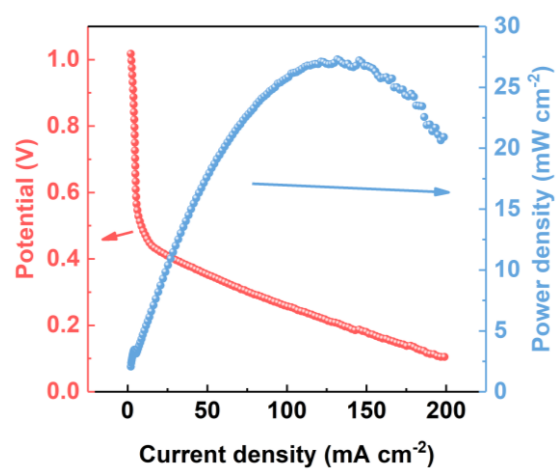

**Fig. S10** The polarization curve and corresponding power density of the two-electrode system in a dissymmetrical acid (Pt-C/CP for HER)-base (Co-S/NF for SOR) coupled electrolyzer (this electrolyzer is used as the galvanic cell at the low current density).

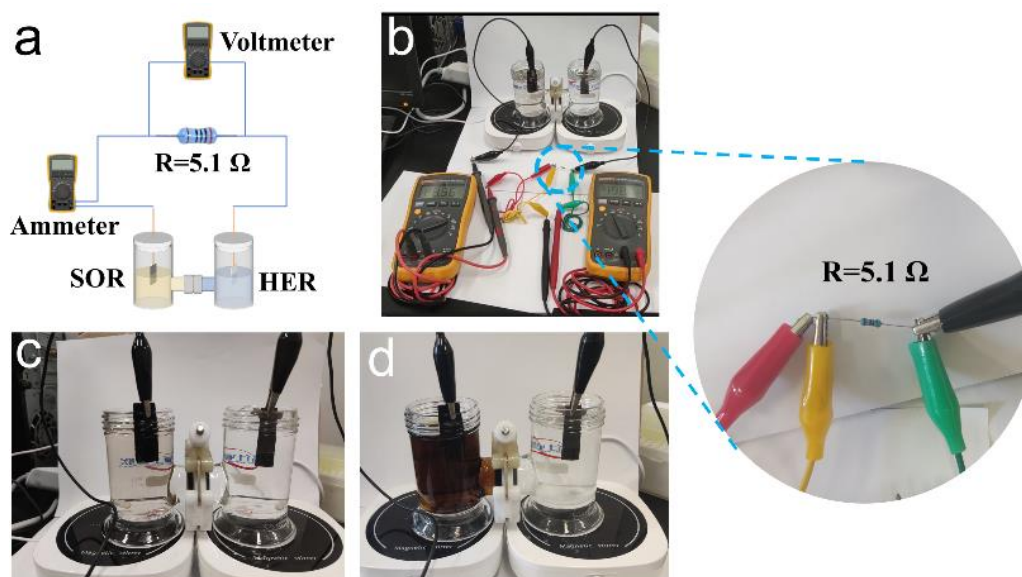

**Fig. S11** (a) Schematic of the circuit, (b) the picture of the actual circuit connection for the acid-base coupling system (positive electrode: Pt-C/CP (0.5 M  $\text{H}_2\text{SO}_4$ ), negative electrode: Mo-Co-S/NF (1 M NaOH containing 1 M  $\text{Na}_2\text{S}$ )) using a resistor ( $5.1\ \Omega$ ) as the load. (c) The picture of the asymmetric acid-base coupling system before driving the load. (d) The picture of the asymmetric acid-base coupling system after working for 12 h.

The calculation formula is as follows:

1 Kg H<sub>2</sub> is generated, and the required amount of charge (Q) is:

$$Q = (1000g \times N_A \times 2e) / M_{H_2} = (1000 \times 2 \times 6.022 \times 10^{23} \times 1.602 \times 10^{-19}) / 2.016 = 95706785.7 \text{ C}$$

Where  $N_A$  is the Avogadro constant,  $e$  is the charge of an electron and  $M_{H_2}$  is the relative molecular mass of hydrogen (H<sub>2</sub>).

For the HER (pH=14) + OER (pH=14) system, the applied voltages (U1) at a current density of 100 mA cm<sup>-2</sup> is 1.822 V. The amount of electricity (W1) required to obtain 1 Kg H<sub>2</sub> is:

$$W1 = QU1 = 95706785.7 \times 1.653 = 158203316.762 \text{ J} \approx 43.945 \text{ KW}\cdot\text{h}$$

For HER (pH=14) + SOR (pH=14) system, the applied voltages (U2) at the current density of 100 mA cm<sup>-2</sup> is 0.515 V.

The amount of electricity (W2) required to obtain 1 Kg H<sub>2</sub> is:

$$W2 = QU2 = 95706785.7 \times 0.515 = 49288994.636 \text{ J} \approx 13.691 \text{ KW}\cdot\text{h}$$

For HER (pH=0) + OER (pH=14) system, the applied voltages (U3) at the current density of 100 mA cm<sup>-2</sup> is 0.840 V.

The amount of electricity (W3) required to obtain 1 Kg H<sub>2</sub> is:

$$W3 = QU3 = 95706785.7 \times 0.840 = 8039369.988 \text{ J} \approx 22.332 \text{ KW}\cdot\text{h}$$

For HER (pH=0) + SOR (pH=14) system, the applied voltages (U4) at the current density of 100 mA cm<sup>-2</sup> is -0.257 V.

The amount of electricity (W3) required to obtain 1 Kg H<sub>2</sub> is:

$$W4 = QU4 = 95706785.7 \times (-0.257) = -24596643.925 \text{ J} \approx -6.832 \text{ KW}\cdot\text{h}$$

**Table S5.** The energy consumption of different systems to obtain 1 Kg H<sub>2</sub> of different systems to obtain 1 Kg H<sub>2</sub> of different electrolytes in this work.

| Catalytic electrodes         | Voltage (V)<br>@ 100 mA cm <sup>-2</sup> | The amount of electricity<br>(KW·h)<br>@ 100 mA cm <sup>-2</sup> |
|------------------------------|------------------------------------------|------------------------------------------------------------------|
| HER (pH=14) +<br>OER (pH=14) | 1.653                                    | 43.945                                                           |
| HER (pH=14) +<br>SOR (pH=14) | 0.515                                    | 13.691                                                           |
| HER (pH=0) +<br>OER (pH=14)  | 0.840                                    | 22.332                                                           |
| HER (pH=0) +<br>SOR (pH=14)  | -0.257                                   | -6.832                                                           |

Calculation of Faradic efficiency for sulfur: The electrolyte after the electrolysis process is acidified by adding sulfuric acid (the pH value of the electrolyte was adjusted to about 1 to form colloidal sulfur based on equation (1)), centrifuged, washed, dried, and weighed to obtain the weight of the sulfur product. According to equations (1) and (2),  $S^{2-}$  is converted into polysulfide ( $S_x^{2-}$ ) and finally sulfur is formed. No matter what the value of x, the number of transferred electrons (n) in the whole SOR process from  $S^{2-}$  to S is 2.

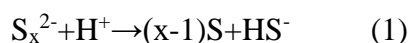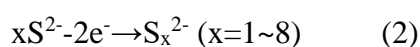

The Faradaic efficiency can be obtained based on the following equations (3) - (5).

$$Q = j \times t \quad (3)$$

$$m_{\text{theory}} = \frac{Q \times M_S}{n \times F} \quad (4)$$

$$\text{Faradaic efficiency}(\%) = \frac{m_s}{m_{\text{theory}}} \times 100\% \quad (5)$$

Where Q is the total quantity of electric charge consumed;  $M_S$  is the relative molecular weight of S (32); n is the number of transferred electrons in the whole SOR process from  $S^{2-}$  to S; F, j and t are the Faraday constant ( $96485 \text{ C mol}^{-1}$ ), the current density and reaction time, respectively;  $m_s$  and  $m_{\text{theory}}$  are the practice and theory weight of generated sulfur.

**Table S6** Yield of sulfur powder and the faradaic efficiency of SOR.

| Time (h) | Practical sulfur powder yield (g) | Theoretical sulfur powder yield (g) | Faradaic efficiency of SOR (%) |
|----------|-----------------------------------|-------------------------------------|--------------------------------|
| 0        | 0                                 | 0                                   | -                              |
| 12       | 0.344                             | 0.358                               | 96.09                          |
| 24       | 0.692                             | 0.717                               | 96.51                          |
| 36       | 1.051                             | 1.075                               | 97.77                          |
| 48       | 1.399                             | 1.433                               | 97.63                          |
| 60       | 1.753                             | 1.792                               | 97.82                          |

## References

1. Li, Y.; Duan, Y.; Zhang, K.; Yu, W., Efficient anodic chemical conversion to boost hydrogen evolution with low energy consumption over cobalt-doped nickel sulfide electrocatalyst. *Chemical Engineering Journal* 2022, 433, 134472.
2. Pei, Y.; Cheng, J.; Zhong, H.; Pi, Z.; Zhao, Y.; Jin, F., Sulfide-oxidation-assisted electrochemical water splitting for H<sub>2</sub> production on a bifunctional Cu<sub>2</sub>S/nickel foam catalyst. *Green Chemistry* 2021, 23 (18), 6975-6983.
3. Yi, L.; Ji, Y.; Shao, P.; Chen, J.; Li, J.; Li, H.; Chen, K.; Peng, X.; Wen, Z., Scalable Synthesis of Tungsten Disulfide Nanosheets for Alkali-Acid Electrocatalytic Sulfion Recycling and H<sub>2</sub> Generation. *Angewandte Chemie International Edition* 2021, 60 (39), 21550-21557.
4. Zhang, L.; Wang, Z.; Qiu, J., Energy-Saving Hydrogen Production by Seawater Electrolysis Coupling Sulfion Degradation. *Advanced Materials* 2022, 34 (16), 2109321.
5. Feng, W.; Cheng, M.; Du, R.; Wang, Y.; Wang, P.; Li, H.; Song, L.; Wen, X.; Yang, J.; Li, X.; He, J.; Shi, J., Gram-Scale Synthesized Two-Dimensional VSe<sub>2</sub> and SnSe<sub>2</sub> for Ultrahigh Electrocatalytic Sulfion Recycling. *Advanced Materials Interfaces* 2022, 9 (13), 2200060.
6. Petrov, K.; Srinivasan, S., Low temperature removal of hydrogen sulfide from sour gas and its utilization for hydrogen and sulfur production. *International Journal of Hydrogen Energy* 1996, 21 (3), 163-169.
7. Zhao, Y.; Wang, S.; Varela, H.; Gao, Q.; Hu, X.; Yang, J.; Epstein, I. R., Spatiotemporal Pattern Formation in the Oscillatory Electro-Oxidation of Sulfide on a Platinum Disk. *The Journal of Physical Chemistry C* 2011, 115 (26), 12965-12971.
8. Zhang, M.; Guan, J.; Tu, Y.; Chen, S.; Wang, Y.; Wang, S.; Yu, L.; Ma, C.; Deng, D.; Bao, X., Highly efficient H<sub>2</sub> production from H<sub>2</sub>S via a robust graphene-encapsulated metal catalyst. *Energy & Environmental Science* 2020, 13 (1), 119-126.
9. Fan, L.; Ji, Y.; Wang, G.; Chen, J.; Chen, K.; Liu, X.; Wen, Z., High Entropy Alloy Electrocatalytic Electrode toward Alkaline Glycerol Valorization Coupling with Acidic Hydrogen Production. *Journal of the American Chemical Society* 2022, 144 (16), 7224-7235.
10. Zhou, Q.; Shen, Z.; Zhu, C.; Li, J.; Ding, Z.; Wang, P.; Pan, F.; Zhang, Z.; Ma, H.; Wang, S.; Zhang, H., Nitrogen-Doped CoP Electrocatalysts for Coupled Hydrogen Evolution and Sulfur Generation with Low Energy Consumption. *Advanced Materials* 2018, 30 (27), 1800140.
